# Supplementary material
Source: PubMed Central journal article supplement (PMC5795389)
Supplement: supp_RA117.000050_4594_1_supp_13857_9xykt6.pdf [file supp_RA117.000050_4594_1_supp_13857_9xykt6.pdf]

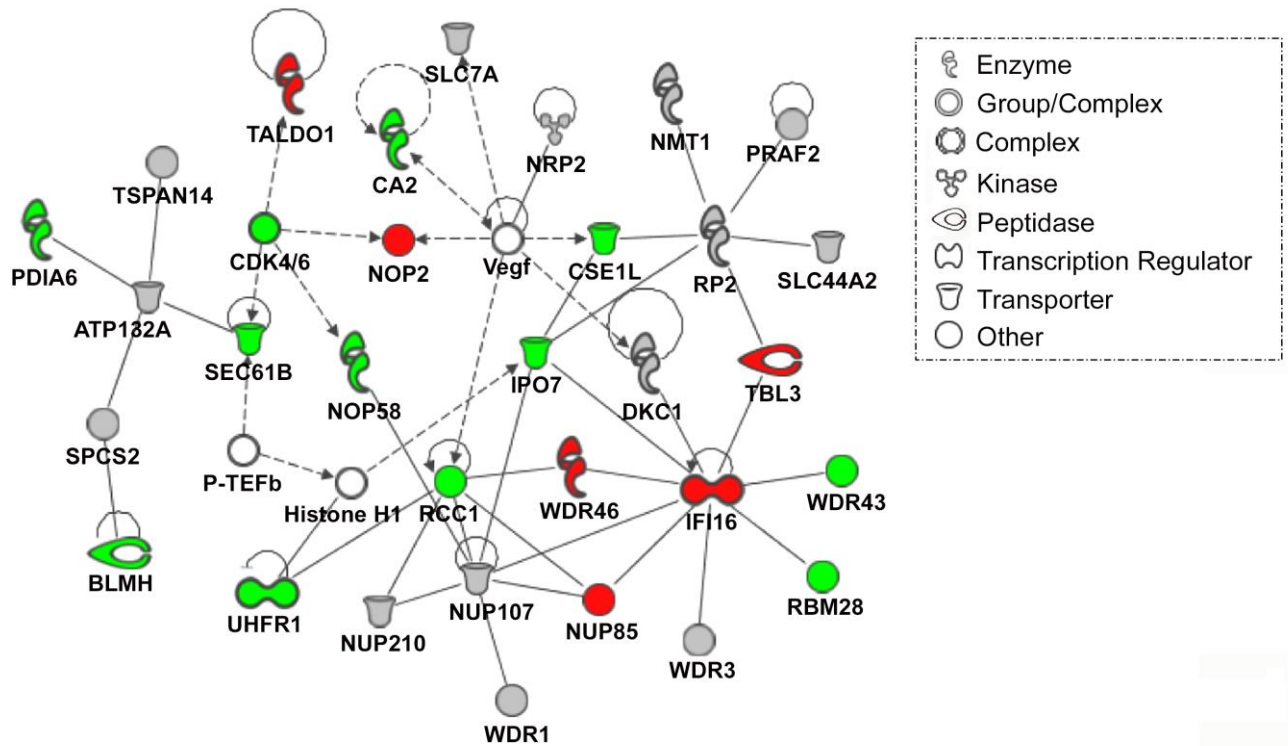

**Supplemental Fig. S1. Acylated proteins from IPA functional network 2 related to RNA posttranscriptional modification, infectious diseases, dermatological diseases and conditions.** Red symbols, acylated proteins upregulated in LPS-stimulated cells; green symbols, acylated proteins downregulated in LPS-stimulated cells; grey symbols, acylated proteins unaffected by LPS; non-acylated proteins are shown in white. Solid and dashed lines indicate direct and indirect interactions, respectively. E3 ubiquitin-protein ligase UHRF1 transiently binds ubiquitin via a thioester linkage at a cysteine residue, hence it can be labeled with 17ODYA without being palmitoylated (Wan J., Roth A. F., Bailey A. O., Davis N. G., (2007) Palmitoylated proteins: purification and identification. *Nature Protocols*, **2**, 1573-1584).
